# Supplementary material
Source: HighWire-hosted journal article supplement (https://www.rcpjournals.org/highwire/filestream/12768/field_highwire_adjunct_files/0/S1._Screenshot_of_After_COVID_eDashboard_showing_numbers_of_patients_at_different_stages_in_the_patient_pathway.pdf)
Supplement: S1._Screenshot_of_After_COVID_eDashboard_showing_numbers_of_patients_at_different_stages_in_the_patient_pathway.pdf [file S1._Screenshot_of_After_COVID_eDashboard_showing_numbers_of_patients_at_different_stages_in_the_patient_pathway.pdf]

## Amplitude Respiratory Questionnaire

Patient safety netting dashboard

Correct as of

Select any number to see the raw data

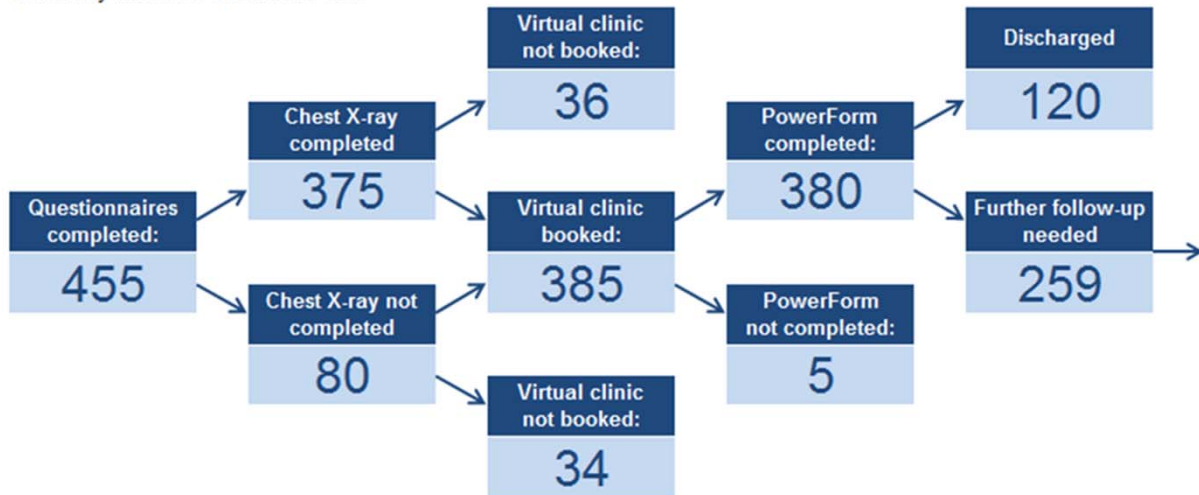

**S1. Screen-shot of ‘After COVID’ eDashboard showing numbers of patients at different stages in the patient pathway, automatically updated each day from the electronic medical records. Snap-shot during summer 2020 for illustrative purposes, not a Consort diagram.**
